# Supplementary material
Source: Springer Nature journal article supplement (https://www.springerprofessional.de/resource/supplementary/13388_2013_33_MOESM1_ESM.pdf/10801390)

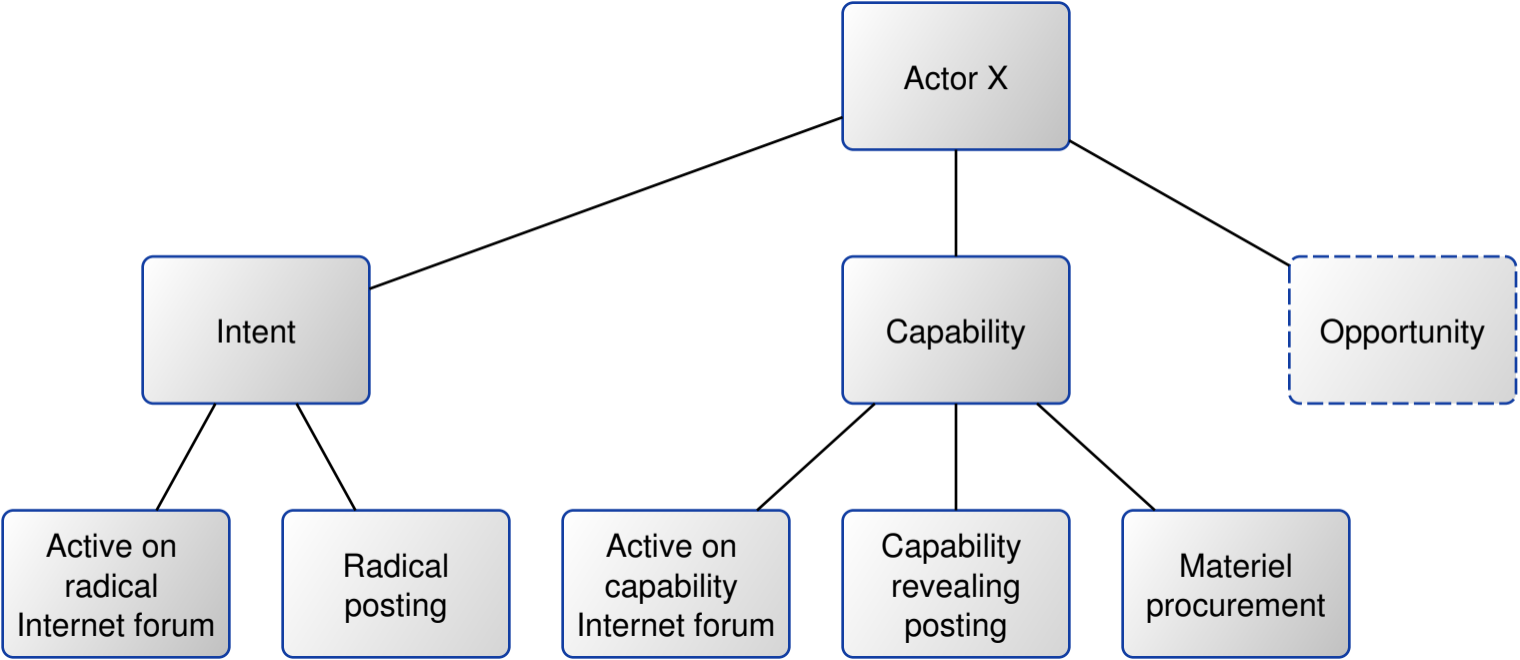

Supplement: MOESM1 [file 10801390]
